# Supplementary material
Source: HighWire-hosted journal article supplement (https://bmjopen.bmj.com/content/10/2/e033273)
Supplement: inline-supplementary-material-1 [file inline-supplementary-material-1.pdf]

### Appendix 1: Final Search Strategy

The search steps 95 Medline (OVID) indexed search and 81 Medline (OVID) non-indexed search are the final search steps. The example and search terminology were used as a basis for subsequent CINAHL, EMBASE, PsycINFO, Web of Science and PSYINDEX database searches.

#### MEDLINE (via Ovid): Indexed search

Database(s):

Ovid MEDLINE(R) 1946 to October Week 4 2018,

Ovid MEDLINE(R) Daily Update November 02, 2018

| #   | Searches                                                                                       | Annotations |
|-----|------------------------------------------------------------------------------------------------|-------------|
| 1.  | (patient* adj3 (centered* or centred* or led* or oriented* or directed* or focus*)).ti,ab,kf.  |             |
| 2.  | (client* adj3 (centered* or centred* or led* or oriented* or directed* or focus*)).ti,ab,kf.   |             |
| 3.  | (person* adj3 (centered* or centred* or led* or oriented* or directed* or focus*)).ti,ab,kf.   |             |
| 4.  | (consumer* adj3 (centered* or centred* or led* or oriented* or directed* or focus*)).ti,ab,kf. |             |
| 5.  | (people* adj3 (centered* or centred* or led* or oriented* or directed* or focus*)).ti,ab,kf.   |             |
| 6.  | (resident* adj3 (centered* or centred* or led* or oriented* or directed* or focus*)).ti,ab,kf. |             |
| 7.  | exp patient centered care/                                                                     |             |
| 8.  | (patient cent* adj3 (care or approach* or therap* or treatment or medic*)).ti,ab,kf.           |             |
| 9.  | (client cent* adj3 (care or approach* or therap* or treatment or medic*)).ti,ab,kf.            |             |
| 10. | (person cent* adj3 (care or approach* or therap* or treatment or medic*)).ti,ab,kf.            |             |
| 11. | (consumer cent* adj3 (care or approach* or therap* or treatment or medic*)).ti,ab,kf.          |             |
| 12. | (people cent* adj3 (care or approach* or therap* or treatment or medic*)).ti,ab,kf.            |             |
| 13. | (resident cent* adj3 (care or approach* or therap* or treatment or medic*)).ti,ab,kf.          |             |
| 14. | (patient oriented adj3 (care or approach* or therap* or treatment or medic*)).ti,ab,kf.        |             |
| 15. | (client oriented adj3 (care or approach* or therap* or treatment or medic*)).ti,ab,kf.         |             |
| 16. | (person oriented adj3 (care or approach* or therap* or treatment or medic*)).ti,ab,kf.         |             |
| 17. | (consumer oriented adj3 (care or approach* or therap* or treatment or medic*)).ti,ab,kf.       |             |
| 18. | (people oriented adj3 (care or approach* or therap* or treatment or medic*)).ti,ab,kf.         |             |

| #   | Searches                                                                                                                                                                                                                                              | Annotations                               |
|-----|-------------------------------------------------------------------------------------------------------------------------------------------------------------------------------------------------------------------------------------------------------|-------------------------------------------|
| 19. | (resident oriented adj3 (care or approach* or therap* or treatment or medic*)).ti,ab,kf.                                                                                                                                                              |                                           |
| 20. | (patient cent?redness or client cent?redness or person cent?redness or consumer cent?redness or people cent?redness or resident cent?redness).ti,ab,kf.                                                                                               |                                           |
| 21. | ((individualised or personalised or individualized or personalized) adj3 (care or approach* or therap* or treatment or medic*)).ti,ab,kf.                                                                                                             |                                           |
| 22. | (patientcent* or clientcent* or personcent* or consumercent* or peoplecent* or residentcent*).ti,ab,kf.                                                                                                                                               |                                           |
| 23. | (patientoriented or clientoriented or personoriented or consumeroriented or peopleoriented or residentoriented).ti,ab,kf.                                                                                                                             |                                           |
| 24. | (patient*orientier* or klient*orientier* or konsument*orientier* or bewohner*orientier* or person*orientier* or patient*zentrier* or klient*zentrier* or konsument*zentrier* or bewohner*zentrier* or person*zentrier*).ot.                           |                                           |
| 25. | ((patient* or klient* or konsument* or bewohner* or person*) adj (zentrier* or orientier*)).ot.                                                                                                                                                       |                                           |
| 26. | (patient focus* adj3 (care or approach* or therap* or treatment or medic*)).ti,ab,kf.                                                                                                                                                                 |                                           |
| 27. | (client focus* adj3 (care or approach* or therap* or treatment or medic*)).ti,ab,kf.                                                                                                                                                                  |                                           |
| 28. | (person focus* adj3 (care or approach* or therap* or treatment or medic*)).ti,ab,kf.                                                                                                                                                                  |                                           |
| 29. | (consumer focus* adj3 (care or approach* or therap* or treatment or medic*)).ti,ab,kf.                                                                                                                                                                |                                           |
| 30. | (people focus* adj3 (care or approach* or therap* or treatment or medic*)).ti,ab,kf.                                                                                                                                                                  |                                           |
| 31. | (resident focus* adj3 (care or approach* or therap* or treatment or medic*)).ti,ab,kf.                                                                                                                                                                |                                           |
| 32. | ((patient* or client* or person* or consumer* or people* or resident* or carer* or caregiver* or nurse* or provider* or doctor* or physician* or provisioner* or clinician* or staff) adj3 (belief* or value* or preference* or attitude*)).ti,ab,kf. |                                           |
| 33. | holistic nursing/                                                                                                                                                                                                                                     |                                           |
| 34. | holistic health/                                                                                                                                                                                                                                      |                                           |
| 35. | integrative medicine/                                                                                                                                                                                                                                 |                                           |
| 36. | holism.ti,ab,kf.                                                                                                                                                                                                                                      |                                           |
| 37. | (holistic* adj3 (care or approach* or therap* or treatment or medic*)).ti,ab,kf.                                                                                                                                                                      |                                           |
| 38. | or/1-37                                                                                                                                                                                                                                               | Patient-centredness                       |
| 39. | ((physical* or psycholog* or emotional*) adj3 (support* or promot* or assist* or aid or sustain*)).ti,ab,kf.                                                                                                                                          | Dimension: Physical and emotional support |
| 40. | ((patient* or client* or person* or consumer* or people* or                                                                                                                                                                                           | Dimension: Communication                  |

| #   | Searches                                                                                                                                                                                                                                                                                                                                                      | Annotations                                    |
|-----|---------------------------------------------------------------------------------------------------------------------------------------------------------------------------------------------------------------------------------------------------------------------------------------------------------------------------------------------------------------|------------------------------------------------|
|     | resident*) adj6 (carer* or caregiver* or nurse* or provider* or between carer and patient doctor* or physician* or provisioner* or clinician*) adj6 (communication or conversation or correspondence)).ti,ab,kf.                                                                                                                                              |                                                |
| 41. | ((shared or participat* or parted or split) adj3 decision*).ti,ab,kf.                                                                                                                                                                                                                                                                                         | Dimension: Patient involvement in care         |
| 42. | ((famil* or friend* or peer group*) and (participat* or information or support)).ti,ab,kf.                                                                                                                                                                                                                                                                    | Dimension: Participation of family and friends |
| 43. | validation studies.pt.                                                                                                                                                                                                                                                                                                                                        |                                                |
| 44. | psychometrics/                                                                                                                                                                                                                                                                                                                                                |                                                |
| 45. | psychometric*.ti,ab,kf.                                                                                                                                                                                                                                                                                                                                       |                                                |
| 46. | (develop* or construct* or evaluat*).ti,ab,kf.                                                                                                                                                                                                                                                                                                                |                                                |
| 47. | exp patient outcome assessment/                                                                                                                                                                                                                                                                                                                               |                                                |
| 48. | **"surveys and questionnaires"/ or exp health care surveys/ or exp health status indicators/ or patient health questionnaire/ or *self report/                                                                                                                                                                                                                |                                                |
| 49. | reliability.ti,ab,kf.                                                                                                                                                                                                                                                                                                                                         |                                                |
| 50. | (validity or validation).ti,ab,kf.                                                                                                                                                                                                                                                                                                                            |                                                |
| 51. | internal consistency.ti,ab,kf.                                                                                                                                                                                                                                                                                                                                |                                                |
| 52. | (testretest or (test adj6 retest)).ti,ab,kf.                                                                                                                                                                                                                                                                                                                  |                                                |
| 53. | kappa*3.ti,ab,kf.                                                                                                                                                                                                                                                                                                                                             |                                                |
| 54. | concordance.ti,ab,kf.                                                                                                                                                                                                                                                                                                                                         |                                                |
| 55. | (factor analys#s or dimensionality or factor structure?).ti,ab,kf.                                                                                                                                                                                                                                                                                            |                                                |
| 56. | (sensitivity or specificity).ti,ab,kf.                                                                                                                                                                                                                                                                                                                        |                                                |
| 57. | (measurement* or test or rating index or questionnaire* or scale* or subscale* or schedule* or inventory* or assess* or instrument*).ti,ab,kf.                                                                                                                                                                                                                |                                                |
| 58. | (addresses or biography or case reports or comment or directory or editorial or festschrift or interview or lectures or legal cases or legislation or letter or news or newspaper article or patient education handout or popular works or congresses or consensus development conference or consensus development conference, nih or practice guideline).pt. | Terwee filter NOT1                             |
| 59. | exp animals/ not humans/                                                                                                                                                                                                                                                                                                                                      | Terwee filter NOT2                             |
| 60. | 43 or 44 or 45 or 46 or 49 or 50 or 51 or 52 or 53 or 54 or 55 or 56                                                                                                                                                                                                                                                                                          |                                                |
| 61. | 47 or 48 or 57                                                                                                                                                                                                                                                                                                                                                |                                                |
| 62. | 60 and 61                                                                                                                                                                                                                                                                                                                                                     | Modification of the Terwee filter              |
| 63. | exp aged/                                                                                                                                                                                                                                                                                                                                                     |                                                |
| 64. | Geriatrics/                                                                                                                                                                                                                                                                                                                                                   |                                                |
| 65. | (olde*2 adj2 (adult*2 or people or person* or patient* or age*2 or man or men or wom#n or client* or residen* or                                                                                                                                                                                                                                              |                                                |

| #   | Searches                                                                                                                                           | Annotations                                   |
|-----|----------------------------------------------------------------------------------------------------------------------------------------------------|-----------------------------------------------|
|     | female? or male? or population*).ti,ab,kf.                                                                                                         |                                               |
| 66. | (elder* or geriat* or geronto* or frail* or senior? or agedly or eldest or very old* or oldest old* or old age*).ti,ab,kf.                         |                                               |
| 67. | (high*3 age*2 or late* life* or late* live*).ti,ab,kf.                                                                                             |                                               |
| 68. | ((liv* or life*) adj2 long*3 adj2 (adult* or people or person* or patient* or man or men or wom#n or client* or residen* or population*).ti,ab,kf. |                                               |
| 69. | advanced in years.ti,ab,kf. or (betagt* or hochbetagt*).ot.                                                                                        |                                               |
| 70. | (age? adj2 65* adj2 (more than or greater or over)).ti,ab,kf.                                                                                      |                                               |
| 71. | ((more than or greater or over or older) adj2 65 year?).ti,ab,kf.                                                                                  |                                               |
| 72. | (longterm care or long term care).ti,ab,kf.                                                                                                        |                                               |
| 73. | nursing home*.ti,ab,kf.                                                                                                                            |                                               |
| 74. | or/63-73                                                                                                                                           | Age                                           |
| 75. | (eng or ger).la.                                                                                                                                   | Language                                      |
| 76. | exp comorbidity/                                                                                                                                   |                                               |
| 77. | polypharmacy/                                                                                                                                      |                                               |
| 78. | Multiple Chronic Conditions/                                                                                                                       |                                               |
| 79. | exp chronic disease/ and multiple.ti,ab,kf.                                                                                                        |                                               |
| 80. | (comorbid* or co-morbid*).ti,ab,kf,ot. or (komorbid* or ko-morbid*).ot.                                                                            |                                               |
| 81. | (multimorbid* or multi*-morbid*).ti,ab,kf,ot.                                                                                                      |                                               |
| 82. | (polymorbid* or poly morbid*).ti,ab,kf,ot.                                                                                                         |                                               |
| 83. | multidisease*.ti,ab,kf.                                                                                                                            |                                               |
| 84. | (burden adj3 (illness or disease? or treatment?)).ti,ab,kf.                                                                                        |                                               |
| 85. | (multi* adj3 (ill* or condition* or disorder* or syndrom* or disease* or medicat*).ti,ab,kf.                                                       |                                               |
| 86. | (chronic* adj3 (disease* or ill* or care or condition* or disorder* or health* or medication* or syndrom* or symptom*).ti,ab,kf.                   |                                               |
| 87. | multimedikat*.ti,ab,kf. or multimedikat*.ot. or multi-medikat*.ot.                                                                                 |                                               |
| 88. | (polymedicat* or poly-medicat*).ti,ab,kf. or polymedikat*.ot. or poly-medikat*.ot.                                                                 |                                               |
| 89. | (polypharmac* or poly-pharmac*).ti,ab,kf. or (polypharmaz* or poly-pharmaz*).ot.                                                                   |                                               |
| 90. | (several adj3 (disease? or illness or diagnos* or condition?)).ti,ab,kf.                                                                           |                                               |
| 91. | or/76-90                                                                                                                                           | Multimorbidity                                |
| 92. | or/39-42                                                                                                                                           | Prioritised dimensions                        |
| 93. | 38 or 92                                                                                                                                           | Patient-centredness or prioritised dimensions |
| 94. | 62 and 74 and 75 and 91 and 93                                                                                                                     |                                               |

| #   | Searches         | Annotations                                                                                                                                                                                                                                                                                                                                           |
|-----|------------------|-------------------------------------------------------------------------------------------------------------------------------------------------------------------------------------------------------------------------------------------------------------------------------------------------------------------------------------------------------|
| 95. | 94 not 58 not 59 | "Patient-centredness" or<br>"Patient involvement in<br>care" or "Communication<br>between carer and patient"<br>or "Physical and emotional<br>support" or "Participation of<br>family and friends"<br>and german/englisch<br>and Terwee strategy<br>modified<br>and age<br>and mulitmorbidity<br>excluded animals, and<br>different publication types |

**MEDLINE (via Ovid): Non-indexed search**

Database(s):

Ovid MEDLINE(R) In-Process &amp; Other Non-Indexed Citations November 02, 2018,

Ovid MEDLINE(R) Epub Ahead of Print November 02, 2018

| #   | Searches                                                                                                                                                | Annotations |
|-----|---------------------------------------------------------------------------------------------------------------------------------------------------------|-------------|
| 1.  | (patient* adj3 (centered* or centred* or led* or oriented* or directed* or focus*)).ti,ab,kf.                                                           |             |
| 2.  | (client* adj3 (centered* or centred* or led* or oriented* or directed* or focus*)).ti,ab,kf.                                                            |             |
| 3.  | (person* adj3 (centered* or centred* or led* or oriented* or directed* or focus*)).ti,ab,kf.                                                            |             |
| 4.  | (consumer* adj3 (centered* or centred* or led* or oriented* or directed* or focus*)).ti,ab,kf.                                                          |             |
| 5.  | (people* adj3 (centered* or centred* or led* or oriented* or directed* or focus*)).ti,ab,kf.                                                            |             |
| 6.  | (resident* adj3 (centered* or centred* or led* or oriented* or directed* or focus*)).ti,ab,kf.                                                          |             |
| 7.  | (patient cent* adj3 (care or approach* or therap* or treatment or medic*)).ti,ab,kf.                                                                    |             |
| 8.  | (client cent* adj3 (care or approach* or therap* or treatment or medic*)).ti,ab,kf.                                                                     |             |
| 9.  | (person cent* adj3 (care or approach* or therap* or treatment or medic*)).ti,ab,kf.                                                                     |             |
| 10. | (consumer cent* adj3 (care or approach* or therap* or treatment or medic*)).ti,ab,kf.                                                                   |             |
| 11. | (people cent* adj3 (care or approach* or therap* or treatment or medic*)).ti,ab,kf.                                                                     |             |
| 12. | (resident cent* adj3 (care or approach* or therap* or treatment or medic*)).ti,ab,kf.                                                                   |             |
| 13. | (patient oriented adj3 (care or approach* or therap* or treatment or medic*)).ti,ab,kf.                                                                 |             |
| 14. | (client oriented adj3 (care or approach* or therap* or treatment or medic*)).ti,ab,kf.                                                                  |             |
| 15. | (person oriented adj3 (care or approach* or therap* or treatment or medic*)).ti,ab,kf.                                                                  |             |
| 16. | (consumer oriented adj3 (care or approach* or therap* or treatment or medic*)).ti,ab,kf.                                                                |             |
| 17. | (people oriented adj3 (care or approach* or therap* or treatment or medic*)).ti,ab,kf.                                                                  |             |
| 18. | (resident oriented adj3 (care or approach* or therap* or treatment or medic*)).ti,ab,kf.                                                                |             |
| 19. | (patient cent?redness or client cent?redness or person cent?redness or consumer cent?redness or people cent?redness or resident cent?redness).ti,ab,kf. |             |
| 20. | ((individualised or personalised or individualized or                                                                                                   |             |

| #   | Searches                                                                                                                                                                                                                                             | Annotations                                        |
|-----|------------------------------------------------------------------------------------------------------------------------------------------------------------------------------------------------------------------------------------------------------|----------------------------------------------------|
|     | personalized) adj3 (care or approach* or therap* or treatment or medic*).ti,ab,kf.                                                                                                                                                                   |                                                    |
| 21. | (patientcent* or clientcent* or personcent* or consumercent* or peoplecent* or residentcent*).ti,ab,kf.                                                                                                                                              |                                                    |
| 22. | (patientoriented or clientoriented or personoriented or consumeroriented or peopleoriented or residentoriented).ti,ab,kf.                                                                                                                            |                                                    |
| 23. | (patient*orientier* or klient*orientier* or konsument*orientier* or bewohner*orientier* or person*orientier* or patient*zentrier* or klient*zentrier* or konsument*zentrier* or bewohner*zentrier* or person*zentrier*).ot.                          |                                                    |
| 24. | ((patient* or klient* or konsument* or bewohner* or person*) adj (zentrier* or orientier*).ot.                                                                                                                                                       |                                                    |
| 25. | (patient focus* adj3 (care or approach* or therap* or treatment or medic*).ti,ab,kf.                                                                                                                                                                 |                                                    |
| 26. | (client focus* adj3 (care or approach* or therap* or treatment or medic*).ti,ab,kf.                                                                                                                                                                  |                                                    |
| 27. | (person focus* adj3 (care or approach* or therap* or treatment or medic*).ti,ab,kf.                                                                                                                                                                  |                                                    |
| 28. | (consumer focus* adj3 (care or approach* or therap* or treatment or medic*).ti,ab,kf.                                                                                                                                                                |                                                    |
| 29. | (people focus* adj3 (care or approach* or therap* or treatment or medic*).ti,ab,kf.                                                                                                                                                                  |                                                    |
| 30. | (resident focus* adj3 (care or approach* or therap* or treatment or medic*).ti,ab,kf.                                                                                                                                                                |                                                    |
| 31. | ((patient* or client* or person* or consumer* or people* or resident* or carer* or caregiver* or nurse* or provider* or doctor* or physician* or provisioner* or clinician* or staff) adj3 (belief* or value* or preference* or attitude*).ti,ab,kf. |                                                    |
| 32. | holism.ti,ab,kf.                                                                                                                                                                                                                                     |                                                    |
| 33. | (Holistic nursing or holistic health or integrative medicine).ti,ab,kf.                                                                                                                                                                              |                                                    |
| 34. | (holistic* adj3 (care or approach* or therap* or treatment or medic*).ti,ab,kf.                                                                                                                                                                      |                                                    |
| 35. | or/1-34                                                                                                                                                                                                                                              | Patient-centredness                                |
| 36. | ((physical* or psycholog* or emotional*) adj3 (support* or promot* or assist* or aid or sustain*).ti,ab,kf.                                                                                                                                          | Dimension: Physical and emotional support          |
| 37. | ((patient* or client* or person* or consumer* or people* or resident*) adj6 (carer* or caregiver* or nurse* or provider* or doctor* or physician* or provisioner* or clinician*) adj6 (communication or conversation or correspondence).ti,ab,kf.    | Dimension: Communication between carer and patient |
| 38. | ((shared or participat* or parted or split) adj3 decision*).ti,ab,kf.                                                                                                                                                                                | Dimension: Patient involvement in care             |
| 39. | ((famil* or friend* or peer group*) and (participat* or information or support)).ti,ab,kf.                                                                                                                                                           | Dimension: Participation of family and friends     |

| #   | Searches                                                                                                                                                                                                                                                                                  | Annotations                       |
|-----|-------------------------------------------------------------------------------------------------------------------------------------------------------------------------------------------------------------------------------------------------------------------------------------------|-----------------------------------|
| 40. | validation studies.pt.                                                                                                                                                                                                                                                                    |                                   |
| 41. | psychometric*.ti,ab,kf.                                                                                                                                                                                                                                                                   |                                   |
| 42. | (develop* or construct* or evaluat*).ti,ab,kf.                                                                                                                                                                                                                                            |                                   |
| 43. | (survey* or questionnaire* or health status indicator* or patient health questionnaire* or self report* or patient reported outcome*).ti,ab,kf.                                                                                                                                           |                                   |
| 44. | reliability.ti,ab,kf.                                                                                                                                                                                                                                                                     |                                   |
| 45. | (validity or validation).ti,ab,kf.                                                                                                                                                                                                                                                        |                                   |
| 46. | internal consistency.ti,ab,kf.                                                                                                                                                                                                                                                            |                                   |
| 47. | (testretest or (test adj6 retest)).ti,ab,kf.                                                                                                                                                                                                                                              |                                   |
| 48. | kappa*3.ti,ab,kf.                                                                                                                                                                                                                                                                         |                                   |
| 49. | concordance.ti,ab,kf.                                                                                                                                                                                                                                                                     |                                   |
| 50. | (factor analys#s or dimensionality or factor structure?).ti,ab,kf.                                                                                                                                                                                                                        |                                   |
| 51. | (sensitivity or specificity).ti,ab,kf.                                                                                                                                                                                                                                                    |                                   |
| 52. | (measurement* or test or rating index or questionnaire* or scale* or subscale* or schedule* or inventory* or assess* or instrument*).ti,ab,kf.                                                                                                                                            |                                   |
| 53. | 40 or 41 or 42 or 44 or 45 or 46 or 47 or 48 or 49 or 50 or 51                                                                                                                                                                                                                            |                                   |
| 54. | 43 or 52                                                                                                                                                                                                                                                                                  |                                   |
| 55. | 53 and 54                                                                                                                                                                                                                                                                                 | Modification of the Terwee filter |
| 56. | (olde*2 adj2 (adult*2 or people or person* or patient* or age*2 or man or men or wom#n or client* or residen* or female? or male? or population*)).ti,ab,kf.                                                                                                                              |                                   |
| 57. | (elder* or geriat* or geronto* or frail* or senior? or agedly or eldest or very old* or oldest old* or old age*).ti,ab,kf.                                                                                                                                                                |                                   |
| 58. | (high*3 age*2 or late* life* or late* live*).ti,ab,kf.                                                                                                                                                                                                                                    |                                   |
| 59. | ((liv* or life*) adj2 long*3 adj2 (adult* or people or person* or patient* or man or men or wom#n or client* or residen* or population*)).ti,ab,kf.                                                                                                                                       |                                   |
| 60. | advanced in years.ti,ab,kf. or (betagt* or hochbetagt*).ot.                                                                                                                                                                                                                               |                                   |
| 61. | (age? adj2 65* adj2 (more than or greater or over)).ti,ab,kf.                                                                                                                                                                                                                             |                                   |
| 62. | ((more than or greater or over or older) adj2 65 year?).ti,ab,kf.                                                                                                                                                                                                                         |                                   |
| 63. | nursing home*.ti,ab,kf.                                                                                                                                                                                                                                                                   |                                   |
| 64. | (longterm care or long term care).ti,ab,kf.                                                                                                                                                                                                                                               |                                   |
| 65. | or/56-64                                                                                                                                                                                                                                                                                  | Age                               |
| 66. | chronic disease.mp. and multiple.ti,ab,kf. [mp=title, abstract, original title, name of substance word, subject heading word, floating sub-heading word, keyword heading word, protocol supplementary concept word, rare disease supplementary concept word, unique identifier, synonyms] |                                   |
| 67. | (comorbid* or co-morbid*).ti,ab,kf,ot. or (komorbid* or ko-                                                                                                                                                                                                                               |                                   |



| #   | Searches                                                                                                                          | Annotations                                                                                                                                                                                                                              |
|-----|-----------------------------------------------------------------------------------------------------------------------------------|------------------------------------------------------------------------------------------------------------------------------------------------------------------------------------------------------------------------------------------|
|     | morbid*).ot.                                                                                                                      |                                                                                                                                                                                                                                          |
| 68. | (multimorbid* or multi*-morbid*).ti,ab,kf,ot.                                                                                     |                                                                                                                                                                                                                                          |
| 69. | (polymorbid* or poly morbid*).ti,ab,kf,ot.                                                                                        |                                                                                                                                                                                                                                          |
| 70. | multidisease*.ti,ab,kf.                                                                                                           |                                                                                                                                                                                                                                          |
| 71. | (burden adj3 (illness or disease? or treatment?)).ti,ab,kf.                                                                       |                                                                                                                                                                                                                                          |
| 72. | (multi* adj3 (ill* or condition* or disorder* or syndrom* or disease* or medicat*)).ti,ab,kf.                                     |                                                                                                                                                                                                                                          |
| 73. | (chronic* adj3 (disease* or ill* or care or condition* or disorder* or health* or medication* or syndrom* or symptom*)).ti,ab,kf. |                                                                                                                                                                                                                                          |
| 74. | multimedikat*.ti,ab,kf. or multimedikat*.ot. or multi-medikat*.ot.                                                                |                                                                                                                                                                                                                                          |
| 75. | (polymedicat* or poly-medicat*).ti,ab,kf. or polymedikat*.ot. or poly-medikat*.ot.                                                |                                                                                                                                                                                                                                          |
| 76. | (polypharmac* or poly-pharmac*).ti,ab,kf. or (polypharmaz* or poly-pharmaz*).ot.                                                  |                                                                                                                                                                                                                                          |
| 77. | (several adj3 (disease? or illness or diagnos* or condition?)).ti,ab,kf.                                                          |                                                                                                                                                                                                                                          |
| 78. | or/66-77                                                                                                                          | Multimorbidity                                                                                                                                                                                                                           |
| 79. | or/36-39                                                                                                                          | Prioritised dimensions                                                                                                                                                                                                                   |
| 80. | 35 or 79                                                                                                                          | Patient-centredness or prioritised dimensions                                                                                                                                                                                            |
| 81. | 80 and 55 and 65 and 78                                                                                                           | “Patient-centredness” or “Patient involvement in care” or “Communication between carer and patient” or “Physical and emotional support” or “Participation of family and friends” and Terwee strategy modified and age and mulitmorbidity |

## Notes:

|             |   |                                                                               |
|-------------|---|-------------------------------------------------------------------------------|
| /           | = | MeSH term                                                                     |
| exp /       | = | explode MeSH term                                                             |
| .ti,ab,kf.. | = | title, abstract, keyword heading word                                         |
| .mp.        | = | title, original title, abstract, name of substance word, subject heading word |
| .ot..       | = | original title                                                                |
| .pt.        | = | publication type                                                              |

## Truncation, wildcards:

|        |   |                                                                                       |
|--------|---|---------------------------------------------------------------------------------------|
| *      | = | any number of characters                                                              |
| #      | = | exact 1 character                                                                     |
| ?      | = | 0 or 1 character                                                                      |
| term*n | = | 0 to <i>n</i> characters (example: high*3 finds high, higher, highest, not highlight) |

Proximity operators:

$adj_n$  = terms with  $n-1$  words in between in any order
